# Supplementary material for: Influences of ABO blood group, age and gender on plasma coagulation factor VIII, fibrinogen, von Willebrand factor and ADAMTS13 levels in a Chinese population
Source: PeerJ. 2017 Mar 30;5:e3156. doi: 10.7717/peerj.3156 (PMC5376111; doi:10.7717/peerj.3156)
Supplement: Data S1 [file peerj-05-3156-s001.xlsx]

## Sheet: Figure 1 and Tbale 2
Coagulation factor VIII raw data (activity,%)													Fbg raw data (mg/dL)													vWF:Ag raw data (%)													vWF:CBA raw data (%)
ABO blood type						Age				Gender			ABO blood type						Age				Gender			ABO blood type						Age				Gender			ABO blood type						Age				Gender
A	AB	B	non-O	O		<40 y	40-49 y	>50 y		male	female		A	AB	B	non-O	O		<40 y	40-49 y	>50 y		male	female		A	AB	B	non-O	O		<40 y	40-49 y	>50 y		male	female		A	AB	B	non-O	O		<40 y	40-49 y	>50 y		male
83.4	104.1	88.4	83.4	101.4		88.6	94.6	83.4		88.4	83.4		216.25	246.4	352.13	216.25	182.6		236.4	301.7	277.8		236.4	198.2		88.4	156.7	97.5	88.4	132.6		50.21	91.06	108.62		129.68	50.214		123.6	165.2	142.2	123.6	124.2		65	90.3	104		133.4
77.8	93	72.6	77.8	47.7		70.6	101	174.8		57.6	77.3		287.5	314.3	280.63	287.5	251.2		198.2	298.6	324		260.7	246.4		164.3	121.2	91.6	164.3	70.2		63.21	106.99	104.55		63.209	92.38		117	132.2	121.2	117	123		52.1	140	103.3		107.3
64.7	112.2	72.6	64.7	58.8		81.4	108	101.9		72.6	72.6		382.5	298.6	256.1	382.5	276.2		260.7	298.6	358.9		223.4	182.6		130.9	130.1	107.4	130.9	71.6		92.38	121.11	182.44		126.2	94.892		132.1	124.5	124.3	132.1	111		111.6	123	73.5		96.4
114	125.5	101.8	114	73.1		60.5	101.6	82.8		60.5	77.8		277.8	227.3	345.25	277.8	227.2		223.4	289.9	259.4		188.8	297.6		90.8	142	90.5	90.8	88.4		22.8	122.3	174.51		121.06	150.3		130.5	75.47	119	130.5	101.1		70.4	80.7	91		111
65.9	94.1	93.8	65.9	60.2		64.7	122.5	115.3		64.7	72.6		318.25	308.3	244.9	318.25	277.3		332.9	427.2	305.8		244.9	193.4		79.2	97.5	96.1	79.2	70.5		88.7	160.33	61.17		141.48	74.808		100.5	100.77	151.96	100.5	101.1		86	101	70.3		85.5
95.7	111.9	93.8	95.7	69.8		80	94	102		114	51.4		289.4	308.3	277.25	289.4	330.4		246.4	256.1	364.7		381.8	289.4		150.3	110.5	130.2	150.3	76.1		74.89	97.7	129.68		125.253	54.1		152.7	78.32	110.1	152.7	105.9		80.2	90	79.2		149.5
92.4	77.9	93.8	92.4	38.6		73.7	93.8	112.2		93.8	101.8		442	355.8	340.5	442	280.1		182.6	276.1	344		332.9	323.3		114.9	97.2	78.2	114.9	49.3		83.7	90.1	102.25		78.137	183.11		157.8	137.25	135.12	157.8	111		69.4	60.7	91.3		87.4
116.9	77.3	70.9	116.9	36.3		73.8	99.3	171.2		93.8	94.2		132.88	259.4	237	132.88	226.5		297.6	294	344.6		332.9	314.3		97.8	136.99	82.9	97.8	56		74.81	164.3	104.19		121.47	99.7		99.9	140.87	155.1	99.9	81		85.7	92.4	90.4		104.4
91.4	94.2	75.4	91.4	68.9		81	106	80.8		83	93.8		193.4	355.8	322.5	193.4	291.4		193.4	348.7	353.4		277.8	332.9		102.6	99.7	88.3	102.6	78		84.1	98.92	109.5		26.6	154.5		135.5	80.825	112.8	135.5	97.2		119	94.77	107.2		25.8
100.1	127.8	55.8	100.1	55.6		48.6	104.9	159.4		48.6	79.2		182.6	413.75	193.13	182.6	322.1		188.8	342.8	285		301.7	200.6		93.8	92.38	97.4	93.8	81.8		56.6	121.47	93.7		174.51	104.1		102.8	150.675	99.33	102.8	52.477		107.3	113.5	117		123
87.9	86.2	77.4	87.9	86.3		92.4	91.5	104.7		92.4	65.9		188.13	291	335.88	188.13	344.1		244.9	417.3	256.1		427.2	289.9		89.9	77.8	127.2	89.9	104.2		103.11	90.3	152.4		97.7	98.783		83.81	134.3	153.5	83.81	25.802		112	107.1	90.7		94.77
103.3	94	97.7	103.3	51		71.7	123.9	136.5		101.7	70.9		331.25	353.2	234.1	331.25	297		234.1	394.7	366.9		256.1	349.8		107.6	114.6	125	107.6	68.6		125.25	103.6	140.7		83.915	106.819		94.87	127.8	102.4	94.87	62.177		79.3	82	180.3		133.5
103.8	94	101.7	103.8	90.6		97.7	94	121.2		101.7	75.4		365.75	382.5	289.4	365.75	280.1		381.8	388.9	277.8		276.1	307.7		80.2	67	92.7	80.2	100.1		99.7	152.7	150.9		123.79	225.026		83.45	117.7	85.95	83.45	72.4		62.7	90	98.7		107.1
65.3	123.9	101.7	65.3	69.8		60.1	74.2	110.7		55.1	55.8		382.5	355.8	200.6	382.5	282.7		314.3	338.3	353.2		294	285.8		93.5	135.12	100.9	93.5	70.8		147.07	97.19	126.2		80.7	170.68		63.24	129.82	95.4	63.24	61.692		92	91	200.3		70.07
84.6	100.8	100.6	84.6	58.8		81.2	73.2	180.3		71.5	77.4		603.75	157.8	289.9	603.75	259.4		332.9	348.7	394.7		348.7	307.7		93.5	117.3	95.1	93.5	55.9		103.76	103.4	104		77.185	98.2		93.2	129.04	155.3	93.2	87.2		87.5	105.4	99.7		90.8
102.5	123.9	58.9	102.5	53.8		89.3	109.2	114.4		100.1	95.7		376.75	305.4	298.38	376.75	302.4		200.6	240.2	381.8		240.2	298.6		111.9	126.2	117.3	111.9	57.6		68.78	88.4	206.4		97.707	135.8		86.72	150.7	88.6	86.72	32.204		57.6	73	154.3		150.4
102.3		104.6	102.3	44.9		87.8	89.5	124.7		127.8	97.7		277.8		360.5	277.8	327.2		289.4	298.6	363.4		298.6	298.6		85.6		95.2	85.6	61.7		78.14	97.71	108.3		114.6	192.436		94.77		118.6	94.77	35.5		28.6	63.24	140.2		100.77
104.2		126.7	104.2	59.4		64.6	81.7	120.2		104.6	73.7		277.8		520.63	277.8	340		332.9	323.3	272.4		253.4	289.9		102.1		93.1	102.1	60		66.82	114.6	118.9		118.9	125		113.2		85.7	113.2	70.07		69.7	101	89.4		132.8
103.2		126.7	103.2	58.9		83.3	78.7	103.9		103.3	116.9		256.1		372.13	256.1	320.7		289.9	260.7	416.9		419.6	342.8		92		89.2	92	78.7		92.4	123.79	187.72		157.183	150.33		98.95		147.4	98.95	80.3		75.3	72	121.7		97.6
174.9		104.6	174.9	61.2		74.6	104.6	63.2		104.6	91.4		318.25		309.13	318.25	299.1		349.8	253.7	355.8		253.4	417.3		127.5		154.5	127.5	73.2		95.03	132.4	132.3		102.4	131.15		108.62		108.5	108.62	28.25		70.4	88.66	80.7		99.33
71.5		104.6	71.5	42		105.5	101.6	114.6		104.6	100.6		420.5		244.88	420.5	299.9		277.8	301.7	474.7		253.4	394.7		130.9		106.8	130.9	66.9		110.68	164.5	120.87		120.68	92.6		99.55		140.47	99.55	99.5		76	152.7	152.1		145.7
127.9		127.9	127.9	125.3		80.3	91.6	108.8		80.3	58.9		347.5		247.13	347.5	419.6		307.7	355.8	454.9		318.3	388.9		98.7		77.2	98.7	136.2		82.7	95.83	129.59		140.7	81.466		182.44		136.99	182.44	89.87		80.35	90	99.3		128.7
86.5		72.9	86.5	63.6		117.9	107.7	101.5		127.9	63.5		272.4		354.25	272.4	276.5		285.8	289.9	332.9		293.8	338.3		86.2		130.1	86.2	85.7		141.48	120.68	108.24		153.76	93.6		174.51		121.11	174.51	110.5		75.4	121	108.2		124.3
134.8		122.9	134.8	87.8		72.9	70.1			72.9	87.9		302.13		312.5	302.13	259.4		307.7	299.9			276.5	260.7		98.1		109.8	98.1	86		66.6	140.7			77.6	88.4		121.17		122.3	121.17	90.8		78.32	99.5			85.7
121.9		108	121.9	83.7		83.4	101.5			84.6	126.7		285		119.63	285	260.8		277.8	307.7			285	301.7		105.7		102	105.7	98.6		109.7	97.18			130.9	103.79		112.2		160.33	112.2	89.4		101.2	129.4			63.24
89.5		108	89.5	69.2			83.4			108	126.7		198.2		175.25	198.2	296.1			419.6			260.8	301.7		92.4		161.8	92.4	90.3			87.8			142.25	160.87		180.2		137.7	180.2	111.7			75			112.8
102.8		97	102.8	63.7			87.3			108	66.3		260.7		338	260.7	297			253.4			260.8	355.8		104.1		120.5	104.1	92.3			92.4			183.11	85.825		120.8		120.1	120.8	80.7			99			125.4
115.3		108.8	115.3	133.6			82.6			91.6	73.7		500.75		163.25	500.75	304.7			318.3			337.7	289.9		83		180.3	83	140.6			153.76			155.56	150.675		159.4		164.3	159.4	152.1			95.9			105.9
101.7		93.3	101.7	52.7			87.8			102.5	70.7		407.13		346	407.13	201.3			227.3			312.4	299.9		100.2		127.5	100.2	101.4			183.11			287.975	164.3		144.7		98.92	144.7	102.3			97.5			97.5
171.2		146	171.2	94.5			72.6			94	86.2		437.25		450.13	437.25	394.8			308.3			308.3	227.3		58.2		96.4	58.2	94.4			78.62			102.4	127.8		136.5		119.5	136.5	80			73.45			78.32
144.7		77	144.7	74			51.4			73.8	80		139.5		207.88	139.5	401.2			354			244.9	308.3		124.2		84.2	124.2	126.2			114.19			155.08	84.7		121.2		93.7	121.2	121			80.35			101.1
156.5		164	156.5	91			121.8			93.3	74.8		152.75		341.88	152.75	340			293.8			275.6	354		98.2		123.8	98.2	99.6			131.15			78.62	155.08		120.7		152.4	120.7	104.2			128			86.7
101.7		74.2	101.7	84.5			64.2			146	103.8		268.38		236.4	268.38	290.5			276.5			602.2	310		135.8		155.1	135.8	86			94.7			95.5	131.15		180.3		140.7	180.3	85.4			73			88.66
120.3		114.6	120.3	48.6			93.8			174.9	65.3		128.88		223.4	128.88	214.7			310			275.6	342.3		82		147.07	82	74.2			98.1			139.82	64.7		134.4		150.9	134.4	79.3			80			152.7
114.4		111.2	114.4	43.2			119.2			71.5	94		381.75		193.4	381.75	223.2			342.3			249.9	308.3		87		153.76	87	79.4			139.82			78.7	128.5		124.7		98.1	124.7	88			121			86.72
124.7		150.7	124.7	68			105.9			123.9	122.9		204.75		323.3	204.75	340			308.3			355.8	259.4		143.8		183.11	143.8	79.2			131.15			135.119	147.07		120.2		139.82	120.2	78			124			123.25
65.4		81.5	65.4	143.7			120.7			164	94.6		276.25		332.9	276.25	310.7			259.4			286.2	332.9		72		78.62	72	102.4			119.04			155.1	88.014		128.9		131.15	128.9	101			85.4			142.2
115.2		92.7	115.2	54.5			85.4			74.2	97		425		332.9	425	344			332.9			318.6	323.3		88		114.19	88	74.8			141.48			81.5	109.68		132.8		119.04	132.8	99.7			79.3			95.3
110.1		71.1	110.1	44.1			55.8			73.2	108.8		305.88		332.9	305.88	216.8			285			337.7	324		98.4		73.79	98.4	50.6			155.1			99.28	101.3		97.6		141.48	97.6	86.7			63			81
83.1		115.8	83.1	115.8			97.4			79.2	48.3		265.88		349.8	265.88	346			260.8			368.4	318.6		221.6		109.68	221.6	123.6			88.12			102.258	73.2		99.33		155.1	99.33	107.5			98.7			99.5
69.6		89.2	69.6	84.5			95.7			89.5	102.3		247.13		307.7	247.13	255.5			260.8			303.7	289.5		110.6		142.25	110.6	74.4			97.8			102.25	130.4		145.7		88.12	145.7	84.4			80.7			139.4
84.5		91	84.5	60.5			107.7			101.7	91.6		168.5		285.8	168.5	266.3			337.7			277.8	265.7		160.7		102.4	160.7	88.6			101.3			125.25	123.87		128.7		97.8	128.7	76			101.6			131.5
134		101.4	134	77.6			93.7			158.7	104.2		287.5		307.7	287.5	247			323.3			324	388.9		79		101.3	79	92.6			90.3			99.7	81.079		124.3		101.3	124.3	89			75.5			38.25
98.8		86.6	98.8	86.8			116.9			114.6	103.2		341.88		298.6	341.88	278.5			324			474.7	379.2		93.2		104	93.2	89.4			125.56			147.07	147.07		131.5		90.3	131.5	128			96			95.5
108.4		68.1	108.4	87.8			91.4			101.6	77		198.2		256.1	198.2	305.4			318.6			344	291.4		108.62		78.3	108.62	91			83.4			98.7	98.3		38.25		125.56	38.25	124.9			32.5			87.2
88.8		71.3	88.8	57.6			110.6			91.6	58.6		297.6		276.1	297.6	260.7			312.4			344.6	272.4		88.12		92.6	88.12	160.87			117.98			154.5	22.8		99.5		83.4	99.5	102.4			85.4			128
87.6		92.6	87.6	60.5			168.9			101.7	74.8		244.9		394.7	244.9	188.8			308.3			277.8	344		117.7		81.5	117.7	174.51			140.2			106.8	48.517		127.2		127.98	127.2	98.6			88			124.9
96.9		78.4	96.9	72.6			94.2			150.7	58.6		381.8		388.9	381.8	180.7			244.9			353.2	292.4		147.72		58.9	147.72	121.06			97			104	174.51		128		140.2	128	78.32			78			102.4
98.4		85.4	98.4	51.4			117.9			81.5	127.9		289.9		253.4	289.9	289.4			289.5			272.4	376.5		150.33		95.5	150.33	155.08			155.08			58.9	117.7		124.9		97	124.9	99.2			101			68.6
81.3		89.5	81.3	79.2			106.7				86.5		298.6		301.7	298.6	200.6			265.7				314.3		139.82		77.6	139.82	123.87			173.87				119.04		102.4		135.7	102.4	123			99.7
86.1		91.1	86.1	83			116.7				134.8		427.2		301.7	427.2	277.8			275.6				344		131.15		78.14	131.15	155.56			81.08				221.961		98.6		99.3	98.6	130.47			86.7
80.8		90.2	80.8	48.6			66.3				121.9		342.8		253.4	342.8	301.7			602.2				396.5		119.04		109.5	119.04	161.11			70.4				84.2		78.32		109.4	78.32	126.2			107.5
87.3		106.4	87.3	73.7			73.7				102.8		417.3		253.4	417.3	289.9			388.9				285		141.48		192.44	141.48	99.28			128.62			117.852	123.8		99.2		128.7	99.2	86.4			84.4
82.6		103	82.6	55.1			70.7				115.3		240.2		293.8	240.2	294			379.2				388.4		126.2		225.03	126.2	89.59			108.3			120.085	155.1		123		124	123	108.7			76
95.2		90.6	95.2	71.5			96.2				72		260.7		276.5	260.7	348.7			291.4				312.4		86.4		66.82	86.4	54.1			95.5				147.07		110.7		99.7	110.7	64.7			89
87.6		75.4	87.6	63.5			80				82.2		419.6		259.4	419.6	338.3			272.4				323.6		97.8		74.81	97.8	26.6			150.68				153.76		99.3		86.7	99.3	122.5			70.7
121.3		133.1	121.3	71.5			94.8				171.2		310		260.8	310	348.7			344				358.9		64.7		170.68	64.7	64.1			98.52				183.11		145.2		107.5	145.2	78.32			99
92		85	92	66.3			113.8				100.8		342.3		260.8	342.3	355.8			292.4				259.4		65.2		83.92	65.2	84.7			120.3				78.62		128.7		84.4	128.7	78.014			78.32
78.7		90.1	78.7	73.7			112.3				109.4		285		323.3	285	289.9			275.6				305.8		88.4		71.47	88.4	63.6			117.7				161.11		123		106.3	123	109.68			99.2
85.6		115.6	85.6	70.7			176.4				144.7		312.4		324	312.4	299.9			249.9				353.4		78.7		131.15	78.7	98.7			139.82				108.12		127.3		89	127.3	87			123
96.9		148.5	96.9	80.3			122.9				156.5		289.5		275.6	289.5	318.3			355.8				285		97.7		94.7	97.7	33.2			129.04				97.8		103.2		80.7	103.2	145.2			100
91.1		75.4	91.1	80			94.6				111.2		388.9		602.2	388.9	308.3			286.2				256.1		92.8		98.1	92.8	22.8			78.7				109.5		97.2		99	97.2	118			87
103.8		208.1	103.8	74.8			107				100.7		379.2		291.4	379.2	354			318.6				366.9		94.55		147.07	94.55	80.7			121.96				130.47		147.2		78.62	147.2	99.9			145.2
68		112.6	68	94.6			108.8				120.3		275.6		286.2	275.6	332.9			337.7				394.7		81.08		103.76	81.08	78.01			110.1				126.2		182.3		161.11	182.3	120.45			118
84.4		212.9	84.4	91.6			105.3				114.4		249.9		318.6	249.9	337.7			368.4				381.8		50.21		77.6	50.21	41.17			135.12				86.4		123.6		108.12	123.6	107.3			123
63.8		100.1	63.8	48.3			162.3				124.7		376.5		474.7	376.5	318.6			376.5				363.4		97.71		78.01	97.71	102.26			155.1				128.7		165.2		97.8	165.2	85.4			142
51.6		92.6	51.6	73.8			91.6				108		314.3		256.1	314.3	244.9			314.3				416.9		157.18		65.2	157.18	85.83			81.5				147.72		120.4		180.3	120.4	124.2			85
66.1		100.1	66.1	91.6			104.2				123.9		344		353.2	344	265.7			344				355.8		221.96		120.3	221.96	150.68			99.28				99.3		137.2		160.4	137.2	97.2			81.7
122.8		112.7	122.8	58.6			103.2				63.2		396.5		272.4	396.5	272.4			396.5				364.6		287.98		117.7	287.98	77.19			102.26				160.87		94.87		137.4	94.87	83			90
51.1			51.1	74.8			97				114.6		303.7			303.7	344			303.7				454.9		68.78			68.78	48.95			92.8				109.59		118.5			118.5	100.7			83
64.6			64.6	58.6			58.6				88.8		285			285	292.4			285				332.9		125.25			125.25	63.21			192.44				83.243		128.5			128.5	165.2			108.5
114.9			114.9	73.2			84.8				71.5		388.4			388.4	337.7			388.4				348.7		111.2			111.2	48.52			62.3				161.11		102.8			102.8	120.4			140.47
62.9			62.9	79.2			48.6						277.8			277.8	368.4			312.4						130.1			130.1	43.24			114.19						83.81			83.81	137.07			88.66
79.8			79.8	72			87.9						358.9			358.9	312.4									78.14			78.14	74.89									110.7			110.7	153.76
90.3			90.3	82.2									353.4			353.4	323.6									109.5			109.5	155.08									130.5			130.5	78.6
176.3			176.3	158.7									285			285	324									192.44			192.44	123.87									149.2			149.2	99.7
127.4			127.4	109.4									277.8			277.8	305.8									96.4			96.4	161.1									128.3			128.3	118
130.5			130.5	101.6									394.7			394.7	344									84.2			84.2	77.6									120.4			120.4	132.1
90.3			90.3	91.6									381.8			381.8	344.6									161.11			161.11	78.01									89.5			89.5	130.5
75.4			75.4	100.7									363.4			363.4	366.9									88.12			88.12	65.2									145.2			145.2	98.6
108			108	63.2									416.9			416.9	364.6									97.8			97.8	88.12									109.7			109.7	147.07
			104.1	114.6												246.4	454.9												156.7	84.7												165.2	89.2
			93	88.8												314.3	332.9												121.2	69.3												132.2	98.4
			112.2													298.6													130.1													124.5
			125.5													227.3													142													75.47
			94.1													308.3													97.5													100.77
			111.9													308.3													110.5													78.32
			77.9													355.8													97.2													137.25
			77.3													259.4													136.99													140.87
			94.2													355.8													99.7													80.825
			127.8													413.75													92.38													150.675
			86.2													291													77.8													134.3
			94													353.2													114.6													127.8
			94													382.5													67													117.7
			123.9													355.8													135.12													129.82
			100.8													157.8													117.3													129.04
			123.9													305.4													126.2													150.7
			88.4													352.13													97.5													142.2
			72.6													280.63													91.6													121.2
			72.6													256.1													107.4													124.3
			101.8													345.25													90.5													119
			93.8													244.9													96.1													151.96
			93.8													277.25													130.2													110.1
			93.8													340.5													78.2													135.12
			70.9													237													82.9													155.1
			75.4													322.5													88.3													112.8
			55.8													193.13													97.4													99.33
			77.4													335.88													127.2													153.5
			97.7													234.1													125													102.4
			101.7													289.4													92.7													85.95
			101.7													200.6													100.9													95.4
			100.6													289.9													95.1													155.3
			58.9													298.38													117.3													88.6
			104.6													360.5													95.2													118.6
			126.7													520.63													93.1													85.7
			126.7													372.13													89.2													147.4
			104.6													309.13													154.5													108.5
			104.6													244.88													106.8													140.47
			127.9													247.13													77.2													136.99
			72.9													354.25													130.1													121.11
			122.9													312.5													109.8													122.3
			108													119.63													102													160.33
			108													175.25													161.8													137.7
			97													338													120.5													120.1
			108.8													163.25													180.3													164.3
			93.3													346													127.5													98.92
			146													450.13													96.4													119.5
			77													207.88													84.2													93.7
			164													341.88													123.8													152.4
			74.2													236.4													155.1													140.7
			114.6													223.4													147.07													150.9
			111.2													193.4													153.76													98.1
			150.7													323.3													183.11													139.82
			81.5													332.9													78.62													131.15
			92.7													332.9													114.19													119.04
			71.1													332.9													73.79													141.48
			115.8													349.8													109.68													155.1
			89.2													307.7													142.25													88.12
			91													285.8													102.4													97.8
			101.4													307.7													101.3													101.3
			86.6													298.6													104													90.3
			68.1													256.1													78.3													125.56
			71.3													276.1													92.6													83.4
			92.6													394.7													81.5													127.98
			78.4													388.9													58.9													140.2
			85.4													253.4													95.5													97
			89.5													301.7													77.6													135.7
			91.1													301.7													78.14													99.3
			90.2													253.4													109.5													109.4
			106.4													253.4													192.44													128.7
			103													293.8													225.03													124
			90.6													276.5													66.82													99.7
			75.4													259.4													74.81													86.7
			133.1													260.8													170.68													107.5
			85													260.8													83.92													84.4
			90.1													323.3													71.47													106.3
			115.6													324													131.15													89
			148.5													275.6													94.7													80.7
			75.4													602.2													98.1													99
			208.1													291.4													147.07													78.62
			112.6													286.2													103.76													161.11
			212.9													318.6													77.6													108.12
			100.1													474.7													78.01													97.8
			92.6													256.1													65.2													180.3
			100.1													353.2													120.3													160.4
			112.7													272.4													117.7													137.4
[truncated: 21 more columns]

## Sheet: Figure 2 and Figure 3
			Age	Fbg	ADAMTS13	vWF:Ag	FVIII:C		vWF:CBA	vWF:Rcof	vWF:Ag	Fbg
			22	236.4	866.24	50.21	60.5		65	60.3	50.21	236.4
			24	260.7	1095.4	63.21	48.6		52.1	74.55	63.21	198.2
			25	223.4	834.36	66.82	64.6		69.7	81.08	66.82	260.7
			26	188.8	820.92	72.8	72.9		70.4	68.4	72.8	223.4
			28	244.9	1104.2	50.4	66.3		76	51.4	50.4	332.9
			28	381.8	638.84	74.89	48.6		80.2	83.71	74.89	246.4
			30	332.9	859.12	83.7	73.7		69.4	79.65	83.7	182.6
			32	332.9	686.38	78.14	60.1		28.6	87.3	78.14	297.6
			34	277.8	558.58	84.1	81		89.3	79.3	84.1	193.4
			35	301.7	752.52	56.6	80		76	96.91	56.6	188.8
			35	427.2	1023.04	77.8	88.3		80.7	65.2	77.8	244.9
			36	256.1	552.68	66.6	78.3		78.32	90.21	66.6	234.1
			36	276.1	1279.48	88.7	64.7		86	91.3	88.7	381.8
			37	294	902.84	64.1	87.8		62.7	89.4	64.1	314.3
			37	348.7	711.56	96.8	81.2		87.5	99.19	96.8	332.9
			37	240.2	813.8	55.2	51.4		57.6	68.4	55.2	200.6
			38	298.6	876.08	74.81	88.6		85.7	60.7	74.81	289.4
			38	253.4	760.68	92.38	81.4		85.4	96.8	92.38	332.9
			38	419.6	984.72	92.4	83.3		75.3	92.33	92.4	289.9
			38	253.4	891.08	69.3	58.6		97.5	80	69.3	349.8
			39	253.4	1373.24	110.68	105.5		107.3	104.73	110.68	277.8
			39	318.3	740.92	90.3	80.3		80.35	105.05	90.3	307.7
			39	293.8	635.08	78.3	70.7		84.4	103.4	78.3	285.8
			39	276.5	834.6	68.95	70.6		89.4	92.68	68.95	307.7
			40	285	791.88	94.7	93.8		80.35	107.1	94.7	301.7
			40	260.8	594.52	88.52	94.8		70.7	132.4	88.52	298.6
			40	260.8	684.18	65.7	80		89	92.3	65.7	298.6
			40	337.7	539.82	99.7	101.6		90.4	104.05	99.7	289.9
			41	312.4	851.68	83.4	91.4		96	95.2	83.4	427.2
			41	308.3	1191.08	97.7	94		101	112.53	97.7	256.1
			41	244.9	535.92	90.1	93.8		90	100.8	90.1	276.1
			41	275.6	686.38	92.6	106		94.77	110.95	92.6	294
			41	602.2	827.2	98.92	99.3		91	83.71	98.92	348.7
			41	275.6	566.24	97.8	95.7		98.7	131.84	97.8	342.8
			41	249.9	784.08	65.2	55.8	79.3	97.6	96.91	65.2	417.3
			41	355.8	509.88	88.12	97.4	63	88.5	88.12	88.12	394.7
			41	286.2	1276.2	61.17	82.8		91	89.4	61.17	388.9
			41	318.6	703.36	77.19	74.2		90	99.4	77.19	338.3
			41	337.7	614.14	92.4	73.2		73.5	128	92.4	348.7
			42	368.4	733.36	79.3	74.6		80.7	114.1	79.3	240.2
			42	303.7	594.44	84.7	89.5		73	112.53	84.7	298.6
			42	277.8	996	77.6	120.7		85.4	102.2	77.6	323.3
			42	324	793.2	90.3	78.7		101	128	90.3	260.7
			42	474.7	690.2	103.6	104.6		113.5	124.15	103.6	253.7
			42	344	790.96	104.5	101.6		90	117.56	104.5	301.7
			42	344.6	654.88	85.83	91.6		88.66	145.2	85.83	355.8
			42	277.8	594.52	67	107.7		93.24	124.15	67	289.9
			42	353.2	731.92	88.4	130.2		132.8	150.4	88.4	299.9
			43	272.4	1071.88	97.71	101.5		99.5	128	97.71	307.7
			43	198.2	1292.48	131.15	83.4		102	101.7	131.15	419.6
			43	246.4	790.96	110.68	87.3		75	112.53	110.68	253.4
			43	180.7	654.88	81.5	91.6		87	99.2	81.5	318.3
			43	297.6	594.52	102.3	97.7		92	101.3	102.3	227.3
			43	193.4	1091.41	90.87	63.2		80.7	95.2	90.87	308.3
			43	289.4	890.96	97.2	101.5		99.3	110.76	97.2	354
			44	323.3	731.92	92.8	97		90	124.5	92.8	293.8
			44	314.3	468.28	60	72.6		83	97.3	60	276.5
			44	332.9	694.92	62.3	84.8		73.45	90.7	62.3	310
			44	200.6	566.24	95.5	96.2		86.7	101.3	95.5	342.3
			44	289.9	656.86	103.76	105.9		121	132.6	103.76	308.3
			44	349.8	689.12	83.4	94.2		88	99.9	83.4	259.4
			44	307.7	586.27	78.01	85.4		85.4	107.51	78.01	332.9
			45	285.8	834.2	97.18	87.8		95.9	123.4	97.18	285
			45	307.7	975.24	98.1	64.2		73	90.8	98.1	260.8
			45	298.6	1099.36	114.6	123.9		120.4	132.21	114.6	260.8
			45	298.6	896.84	101.3	107.7		105.4	130.3	101.3	337.7
			45	289.9	719.96	125.56	93.7		101.6	117.5	125.56	323.3
			45	342.8	765.42	90.3	116.9		75.5	140.3	90.3	324
			46	417.3	429.88	141.48	92.4		112	105.4	141.48	318.6
			46	394.7	790.96	117.98	110.6		112.5	132.56	117.98	312.4
			46	388.9	670.16	140.2	158.9		134	140.2	140.2	308.3
			46	338.3	429.88	121.47	81.7		107.1	102.56	121.47	244.9
			46	260.7	690.32	135.08	117.9		145.8	120.45	135.08	289.5
			47	301.7	790.96	123.87	106.7		101	178.9	123.87	265.7
			47	301.7	622.44	81.08	116.7		99.7	142.3	81.08	275.6
			47	355.8	721.32	125.25	101		101.2	101.4	125.25	602.2
			47	289.9	750.92	121.11	132.5		111.6	101.3	121.11	388.9				84.4	103.4	78.3
			47	299.9	680.16	106.99	71.7		100.8	119	106.99	379.2				86.7	101.3	95.5
			47	227.3	810.96	91.06	94.6		90.3	97.71	91.06	291.4				80.35	107.1	94.7
			47	308.3	652.44	78.62	73.7		98.7	155.4	78.62	272.4				70.7	132.4	88.52
			47	354	680.42	103.11	108		129.4	138.64	103.11	344				76	79.3	50.4
			48	310	549.78	120.3	113.8		99	121.8	120.3	292.4
			48	342.3	622.44	117.7	112.3		78.32	119.2	117.7	275.6
			48	308.3	721.32	139.82	176.4		145.2	125.9	139.82	249.9
			48	259.4	509.76	129.04	122.9		123	147.2	129.04	355.8
			48	332.9	738.6	78.7	94.6		118	122.77	78.7	286.2
			48	323.3	589.68	121.96	107		100	147.3	121.96	318.6
			48	324	622.44	110.1	108.8		99.2	178.2	110.1	337.7
			48	318.6	394.72	135.12	105.3		123	123.4	135.12	368.4
			48	289.5	703.8	155.1	162.3		142	144.7	155.1	376.5
			48	265.7	738.6	140.7	82.6		99	100.2	140.7	314.3
			49	388.9	731.65	99.28	104.2		85	104.3	99.28	344
			49	379.2	589.68	102.26	103.2		81.7	148	102.26	396.5
			49	291.4	622.44	160.33	121.8		128	137.56	160.33	303.7
			49	272.4	594.72	123.79	91.5		97.5	99.19	123.79	285
			49	344	622.44	132.4	104.9		140	104.73	132.4	388.4
			49	292.4	621.32	147.07	119.2		152.7	175.5	147.07	312.4
			49	376.5	509.76	108.62	97.9		88.66	93.8	108.62	323.6
			50	314.3	703.8	94.55	83.4		92.4	98.3	94.55	277.8
			50	344	1046.84	182.44	164.8		158.3	133.28	182.44	324
			50	396.5	681.16	109.5	101.9		104	97.01	109.5	358.9
			50	285	359.96	95.03	109.2		80.4	128	95.03	259.4
			50	388.4	580.32	109.68	115.3		103.3	129.81	109.68	305.8
			51	312.4	516.84	102.25	94		107.2	104.2	102.25	364.7
			51	323.6	999.8	104.19	112.2		91.3	90.3	104.19	344
			51	358.9	845.52	112.3	103.9		108.5	129.4	112.3	344.6
			51	259.4	720.96	98.7	80.8		79.2	145.2	98.7	353.4
			51	305.8	586.6	187.72	159.4		150.47	161.84	187.72	285
			51	353.4	725.6	120.7	104.7		119.3	127.3	120.7	256.1
			51	285	594.2	103.24	136.5		148.3	150.4	103.24	366.9
			52	256.1	703.8	126.2	121.2		140.2	143.2	126.2	277.8
			53	366.9	686.64	104	110.7		117	123.6	104	353.2
			53	394.7	725.6	206.4	180.3		200.3	200.3	206.4	394.7
			54	381.8	494.92	108.3	114.4		99.7	124.18	108.3	381.8
			54	363.4	532.68	118.9	124.7		107.5	120.8	118.9	363.4
			55	416.9	759.66	174.51	145.24		154.3	182.3	174.51	272.4
			56	355.8	980	152.4	171.2		180.3	187.5	152.4	416.9
			56	364.6	690.2	102.7	102		121	102.1	102.7	355.8
			56	454.9	554.45	109.7	114.6		108.2	138.5	109.7	474.7
			56	332.9	704.4	140.9	108.8		121.7	128.91	140.9	454.9
			56	348.7	894.92	129.59	101.5		152.1	132.56	129.59	332.9
